# Supplementary material
Source: PubMed Central journal article supplement (PMC3217334)

**Long-Term Follow-up of Participants with Heart Failure in the Antihypertensive and Lipid-Lowering Treatment to Prevent Heart Attack Trial (ALLHAT)**

**On-line Supplemental Material:  
Supplemental Tables 1-4  
Supplemental Figure 1**

**Corresponding Author:**

Linda B. Piller, MD, MPH  
The University of Texas School of Public Health  
1200 Pressler St., W-906  
Houston, TX 77030  
Phone: 713-500-9507  
Fax: 713-500-9596/9530  
Email: [Linda.B.Piller@uth.tmc.edu](mailto:Linda.B.Piller@uth.tmc.edu)

**Supplemental Table 1. Cause-Specific Deaths of HF Cases versus Non-HF Cases**

|                                    | Chlorthalidone |                | Amlodipine  |                | Lisinopril  |                |
|------------------------------------|----------------|----------------|-------------|----------------|-------------|----------------|
|                                    | HF<br>n (%)    | No HF<br>n (%) | HF<br>n (%) | No HF<br>n (%) | HF<br>n (%) | No HF<br>n (%) |
| <b>Incident In-Trial HF Deaths</b> | 87             |                | 65          |                | 44          |                |
| <b>Deaths In-Trial</b>             | 257            | 1990           | 186         | 1088           | 184         | 1148           |
| <b>CVD</b>                         | 164 (63.4)     | 804 (40.4)     | 114 (61.3)  | 462 (42.5)     | 112 (60.9)  | 486 (42.3)     |
| <b>Non-CVD</b>                     | 82 (31.9)      | 1052 (52.9)    | 66 (35.5)   | 537 (49.4)     | 65 (35.3)   | 579 (52.4)     |
| <b>Unknown Cause</b>               | 11 (4.3)       | 134 (6.7)      | 6 ( 3.2)    | 89 (8.2)       | 7 (3.8)     | 83 (7.2)       |
| <b>Deaths Post-Trial</b>           | 211            | 2727           | 178         | 1580           | 136         | 1542           |
| <b>CVD</b>                         | 123 (58.3)     | 1140 (41.8)    | 91 (51.1)   | 647 (40.9)     | 69 (50.7)   | 626 (40.6)     |
| <b>Non-CVD</b>                     | 85 (40.3)      | 1540 (56.5)    | 86 (48.3)   | 899 (56.9)     | 66 (48.5)   | 885 (57.4)     |
| <b>Unknown Cause</b>               | 3 (1.4)        | 47 (1.7)       | 1 (0.6)     | 34 (2.2)       | 1 (0.7)     | 31 (2.0)       |
| <b>Total Deaths</b>                | 555            | 4717           | 429         | 2668           | 364         | 260            |
| <b>CVD</b>                         | 287 (51.7)     | 1944 (41.2)    | 205 (47.8)  | 1109 (41.6)    | 181 (49.7)  | 1112 (41.3)    |
| <b>Non-CVD</b>                     | 167 (30.1)     | 2592 (55.0)    | 152 (35.4)  | 1436 (53.8)    | 131 (36.0)  | 1464 (54.4)    |
| <b>Unknown Cause</b>               | 14 (2.5)       | 181 (3.8)      | 7 (1.6)     | 123 (4.6)      | 8 (2.2)     | 114 (4.2)      |

HF=heart failure; CVD=cardiovascular disease

**Supplemental Table 2. Time-Dependent Cox Regression Analyses of Mortality Outcomes After Hospitalized Heart Failure In-Trial and Post-Trial.**

|                            | HR (95% CI)      |                  |                                                   |                  |                  |                                                |
|----------------------------|------------------|------------------|---------------------------------------------------|------------------|------------------|------------------------------------------------|
|                            | A vs C           |                  |                                                   | L vs C           |                  |                                                |
|                            | In-Trial         | Post-Trial       | <i>P</i> value<br>trt*trial phase<br>inter-action | In-Trial         | Post-Trial       | <i>P</i> value trt*trial<br>phase inter-action |
| <b>All-cause Mortality</b> | 0.90 (0.73-1.11) | 0.88 (0.72-1.08) | 0.888                                             | 1.04 (0.84-1.28) | 0.90 (0.72-1.12) | 0.362                                          |
| • <b>adjusted*</b>         | 0.93 (0.74-1.16) | 0.98 (0.78-1.22) | 0.752                                             | 1.07 (0.84-1.35) | 1.04 (0.82-1.32) | 0.873                                          |
| <b>CVD Mortality</b>       | 0.86 (0.66-1.12) | 0.79 (0.60-1.04) | 0.653                                             | 0.94 (0.72-1.24) | 0.82 (0.61-1.10) | 0.502                                          |
| • <b>adjusted*</b>         | 0.92 (0.69-1.23) | 0.92 (0.68-1.24) | 0.987                                             | 0.96 (0.70-1.30) | 0.98 (0.71-1.37) | 0.903                                          |
| <b>Heart Failure</b>       | 0.68 (0.40-1.17) | 0.59 (0.27-1.28) | 0.766                                             | 1.06 (0.64-1.75) | 0.65 (0.28-1.48) | 0.322                                          |
| • <b>adjusted*</b>         | 0.63 (0.34-1.67) | 0.75 (0.33-1.68) | 0.742                                             | 1.27 (0.72-2.22) | 0.86 (0.35-2.12) | 0.468                                          |
| <b>Other CVD Mortality</b> | 0.93 (0.69-1.26) | 0.83 (0.62-1.11) | 0.573                                             | 0.91 (0.66-1.26) | 0.84 (0.61-1.16) | 0.746                                          |
| • <b>adjusted*</b>         | 1.02 (0.74-1.42) | 0.89 (0.65-1.23) | 0.764                                             | 0.85 (0.59-1.24) | 0.98 (0.69-1.39) | 0.605                                          |
| <b>Non-CVD Mortality</b>   | 0.99 (0.69-1.41) | 1.06 (0.79-1.44) | 0.753                                             | 1.20 (0.84-1.72) | 1.06 (0.77-1.47) | 0.615                                          |
| • <b>adjusted*</b>         | 1.03 (0.69-1.52) | 1.09 (0.78-1.52) | 0.812                                             | 1.28 (0.86-1.91) | 1.20 (0.84-1.71) | 0.806                                          |

\* Adjusted for baseline characteristics of age, race, gender, smoking, education, treatment of hypertension, systolic blood pressure, diastolic blood pressure, pulse, type II diabetes, LVH by ECG, history of coronary heart disease, BMI, eGFR, and time to heart failure.

A=amlodipine; C=chlorthalidone; L=lisinopril; CVD=cardiovascular disease; trt=treatment

**Supplemental Table 3. Time-Dependent Cox Regression Analyses of Mortality Outcomes After Hospitalized Heart Failure In-Trial and Post-Trial by Ejection Fraction.**

|                            |            | HR (95% CI)      |                  |                                              |                  |                   |                                              |
|----------------------------|------------|------------------|------------------|----------------------------------------------|------------------|-------------------|----------------------------------------------|
|                            |            | A vs C           |                  |                                              | L vs C           |                   |                                              |
|                            |            | In-Trial         | Post-Trial       | <i>P</i> trt*trial<br>phase inter-<br>action | In-Trial         | Post-Trial        | <i>P</i> trt*trial<br>phase inter-<br>action |
| <b>All-cause Mortality</b> | <b>PEF</b> | 0.58 (0.33-1.00) | 0.84 (0.55-1.30) | 0.288                                        | 0.88 (0.54-1.44) | 0.96 (0.60-1.52)  | 0.817                                        |
|                            | <b>REF</b> | 0.96 (0.65-1.41) | 0.98 (0.65-1.48) | 0.923                                        | 0.89 (0.56-1.37) | 1.11 (0.72-1.73)  | 0.486                                        |
| • <b>adjusted*</b>         | <b>PEF</b> | 0.68 (0.39-1.19) | 0.92 (0.60-1.42) | 0.408                                        | 1.15 (0.66-2.03) | 0.81 (0.48-1.36)  | 0.348                                        |
|                            | <b>REF</b> | 0.96 (0.65-1.43) | 0.96 (0.64-1.46) | 0.988                                        | 0.94 (0.61-1.43) | 1.13 (0.72-1.76)  | 0.559                                        |
| <b>CV Mortality</b>        | <b>PEF</b> | 0.85 (0.40-1.81) | 0.66(0.37-1.18)  | 0.594                                        | 0.72 (0.33-1.59) | 0.90 (0.49-1.64)  | 0.667                                        |
|                            | <b>REF</b> | 0.97 (0.61-1.56) | 0.70 (0.39-1.23) | 0.379                                        | 0.83 (0.49-1.42) | 0.95 (0.53-1.71)  | 0.740                                        |
| • <b>adjusted*</b>         | <b>PEF</b> | 1.08 (0.50-2.33) | 0.74 (0.41-1.34) | 0.448                                        | 0.78 (0.35-1.74) | 0.96 (0.52-1.76)  | 0.689                                        |
|                            | <b>REF</b> | 0.98 (0.61-1.58) | 0.68 (0.38-1.22) | 0.338                                        | 0.87 (0.51-1.48) | 0.93 (0.52-1.69)  | 0.870                                        |
| <b>Heart Failure</b>       | <b>PEF</b> | 0.36 (0.07-1.88) | 0.51 (0.05-5.64) | 0.826                                        | 0.39 (0.08-2.01) | 1.45 (0.20-10.38) | 0.312                                        |
|                            | <b>REF</b> | 0.92 (0.37-2.30) | 0.71 (0.06-7.96) | 0.784                                        | 0.84 (0.31-2.28) | 1.20 (0.11-13.20) | 0.787                                        |
| • <b>adjusted*</b>         | <b>PEF</b> | 0.42 (0.08-2.21) | 0.64 (0.06-7.20) | 0.779                                        | 0.48 (0.09-2.48) | 1.52 (0.21-11.05) | 0.676                                        |
|                            | <b>REF</b> | 0.94 (0.37-2.36) | 0.69 (0.06-7.79) | 0.812                                        | 0.94 (0.34-2.58) | 1.35 (0.12-15.05) | 0.785                                        |
| <b>Other CVD Mortality</b> | <b>PEF</b> | 1.12 (0.46-2.71) | 0.66 (0.36-1.20) | 0.338                                        | 0.90 (0.36-2.26) | 0.85 (0.45-1.61)  | 0.928                                        |
|                            | <b>REF</b> | 1.10 (0.63-1.91) | 0.63 (0.35-1.14) | 0.185                                        | 0.91 (0.48-1.73) | 0.84 (0.47-1.50)  | 0.841                                        |
| • <b>adjusted*</b>         | <b>PEF</b> | 1.45 (0.59-3.56) | 0.75 (0.41-1.38) | 0.230                                        | 0.95 (0.37-2.40) | 0.91 (0.48-1.72)  | 0.938                                        |
|                            | <b>REF</b> | 0.99 (0.57-1.73) | 0.70 (0.39-1.26) | 0.397                                        | 0.83 (0.44-1.55) | 0.94 (0.56-1.72)  | 0.777                                        |
| <b>Non-CVD Mortality</b>   | <b>PEF</b> | 0.45 (0.19-1.04) | 1.31 (0.67-2.59) | 0.052                                        | 1.09 (0.56-2.11) | 1.19 (0.56-2.52)  | 0.858                                        |
|                            | <b>REF</b> | 0.78 (0.35-1.73) | 1.40 (0.76-2.58) | 0.252                                        | 1.04 (0.48-2.25) | 1.28 (0.64-2.56)  | 0.693                                        |
| • <b>adjusted*</b>         | <b>PEF</b> | 0.50 (0.21-1.17) | 1.39 (0.70-2.74) | 0.064                                        | 1.15 (0.59-2.24) | 1.23 (0.58-2.60)  | 0.890                                        |
|                            | <b>REF</b> | 0.80 (0.36-1.77) | 1.42 (0.76-2.65) | 0.265                                        | 1.09 (0.50-2.36) | 1.35 (0.67-2.71)  | 0.678                                        |

\* Adjusted for baseline characteristics of age and time to HF.

Abbreviations: A=amlodipine; C=chlorthalidone; L=lisinopril; EF=ejection fraction; PEF=Preserved ejection fraction; REF=Reduced ejection fraction; CV=Cardiovascular; CVD= Cardiovascular Disease

**Supplemental Table 4. Shift in Medication Status for Hospitalized HF Patients from Before to After HF Event (for patients with medication data available)\***

| % Shift in Medication Status from before to after HF event n, % | Assigned Treatment Group              |                                   |                                   |
|-----------------------------------------------------------------|---------------------------------------|-----------------------------------|-----------------------------------|
|                                                                 | Chlorthalidone<br>HF Event<br>(n=530) | Amlodipine<br>HF Event<br>(n=428) | Lisinopril<br>HF Event<br>(n=344) |
| <b>On Any Diuretic</b>                                          |                                       |                                   |                                   |
| -                                                               | 60, 11%                               | 26, 6%                            | 16, 5%                            |
| +                                                               | 56, 11%                               | 165, 39%                          | 133, 39%                          |
| <b>On Any Calcium-Channel Blocker</b>                           |                                       |                                   |                                   |
| -                                                               | 30, 6%                                | 139, 32%                          | 16, 5%                            |
| +                                                               | 59, 11%                               | 15, 4%                            | 44, 13%                           |
| <b>On Any ACE-Inhibitor</b>                                     |                                       |                                   |                                   |
| -                                                               | 27, 5%                                | 16, 4%                            | 59, 17%                           |
| +                                                               | 142, 27%                              | 125, 29%                          | 19, 6%                            |
| <b>On Any Alpha-Blocker</b>                                     |                                       |                                   |                                   |
| -                                                               | 11, 2%                                | 8, 2%                             | 8, 2%                             |
| +                                                               | 18, 3%                                | 11, 3%                            | 11, 3%                            |
| <b>On Atenolol</b>                                              |                                       |                                   |                                   |
| -                                                               | 380, 72%                              | 45, 11%                           | 37, 11%                           |
| +                                                               | 18, 3%                                | 16, 4%                            | 23, 7%                            |

\*Medication categories are not mutually exclusive/may be on more than one medication at a visit

+ = moved on to medication; - = moved off of medication

HF=heart failure; ACE=angiotensin converting enzyme

Supplemental Figure 1. Adjusted KM curves of case fatality by HF with preserved ejection fraction ( $\geq 50$ ) and reduced ejection fraction ( $< 50$ ); Population based on ALLHAT definition from the Heart Failure Validation Study\*

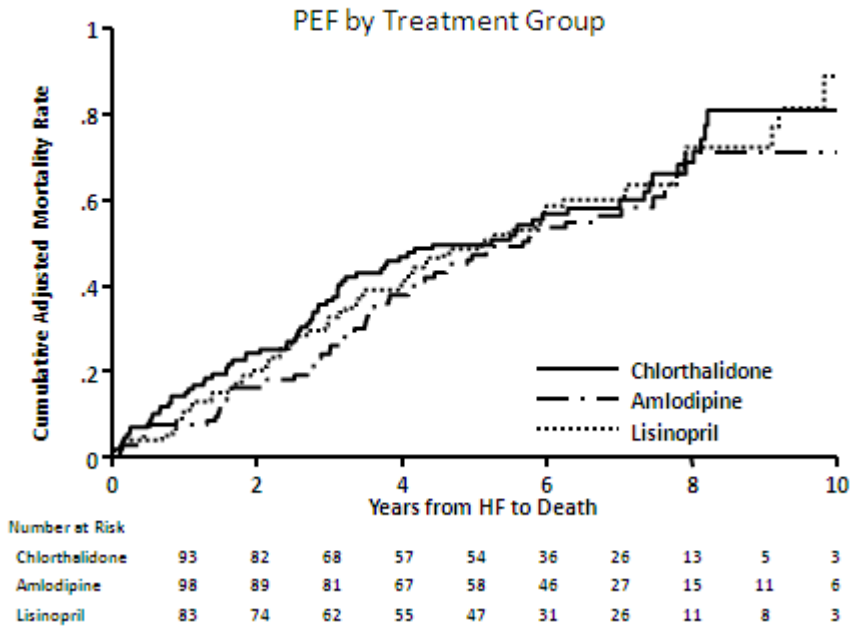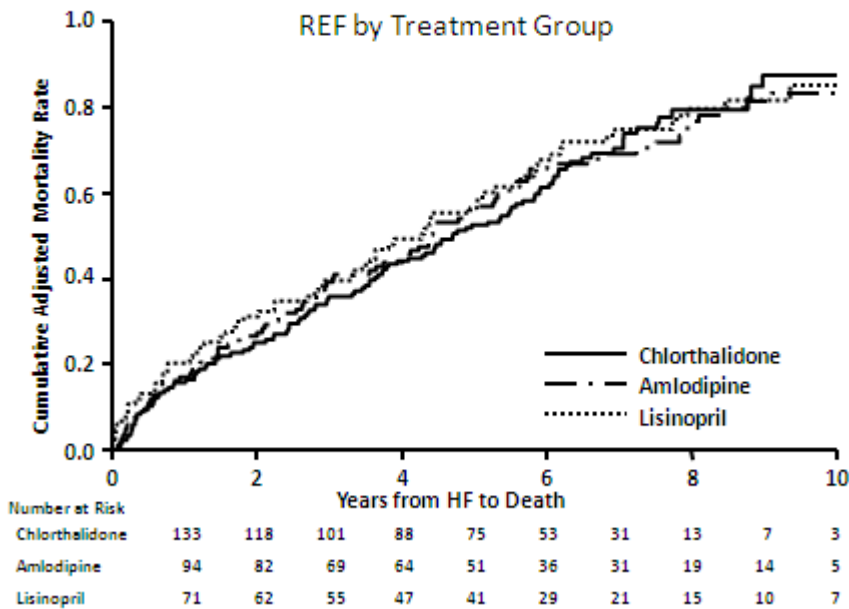

Supplement: NIHMS328335-supplement-1.pdf [file NIHMS328335-supplement-1.pdf]
